# Supplementary material
Source: PubMed Central journal article supplement (PMC4843659)
Supplement: rspb20160246supp1.pdf [file rspb20160246supp1.pdf]

Electronic supplementary material

“Chronic neonicotinoid pesticide exposure and parasite stress differentially affects learning in honeybees and bumblebees”

Saija Piironen & Dave Goulson

Supplementary Table S1. PCR reactions and thermal cycle conditions used in parasite screenings. Changes made to the original PCR reaction and thermal cycle conditions are indicated in bold.

| Species                                  | <i>N. ceranae</i>                                                                                                                                         | <i>N. apis</i>                                                                                        | <i>N. bombi</i>                                                                                      | <i>A. bombi</i>                                                                                      | <i>C. bombi</i>                                                                                      | <i>Apidae</i>                                                                                        |
|------------------------------------------|-----------------------------------------------------------------------------------------------------------------------------------------------------------|-------------------------------------------------------------------------------------------------------|------------------------------------------------------------------------------------------------------|------------------------------------------------------------------------------------------------------|------------------------------------------------------------------------------------------------------|------------------------------------------------------------------------------------------------------|
| Reference                                | Martin-Hernandez et al. 2007                                                                                                                              | Gisder & Genersch 2013                                                                                | Klee et al. 2006                                                                                     | Meeus et al. 2010                                                                                    | Meeus et al. 2010                                                                                    | Meeus et al. 2010                                                                                    |
| Gene                                     | <i>16s</i>                                                                                                                                                | <i>RPBI</i>                                                                                           | <i>16s</i>                                                                                           | <i>18s</i>                                                                                           | <i>18s</i>                                                                                           | <i>18s</i>                                                                                           |
| Product size (bp)                        | 218                                                                                                                                                       | 297                                                                                                   | 323                                                                                                  | 260                                                                                                  | 420                                                                                                  | 130                                                                                                  |
| PCR mix of amplification:                |                                                                                                                                                           |                                                                                                       |                                                                                                      |                                                                                                      |                                                                                                      |                                                                                                      |
| GoTaq® Flexi buffer (X) (Promega)        | <b>1</b>                                                                                                                                                  | 1                                                                                                     | 1                                                                                                    | 1                                                                                                    | 1                                                                                                    | 1                                                                                                    |
| MgCl <sub>2</sub> (mM)                   | 3                                                                                                                                                         | 1.5                                                                                                   | 3.75                                                                                                 | 1.5                                                                                                  | 1.5                                                                                                  | 1.5                                                                                                  |
| Forward primer (μM)                      | 0.4                                                                                                                                                       | 0.2                                                                                                   | 0.2                                                                                                  | 0.5                                                                                                  | 0.5                                                                                                  | 0.1                                                                                                  |
| Reverse primer (μM)                      | 0.4                                                                                                                                                       | 0.2                                                                                                   | 0.2                                                                                                  | 0.5                                                                                                  | 0.5                                                                                                  | 0.2                                                                                                  |
| dNTPs (mM)                               | 0.4                                                                                                                                                       | 0.2                                                                                                   | 0.3                                                                                                  | 0.4                                                                                                  | 0.4                                                                                                  | 0.4                                                                                                  |
| GoTaq® G2 Flexi polymerase (U) (Promega) | <b>1</b>                                                                                                                                                  | <b>1</b>                                                                                              | 0.25                                                                                                 | <b>1</b>                                                                                             | <b>1</b>                                                                                             | <b>1</b>                                                                                             |
| DNA template (μL)                        | <b>2</b>                                                                                                                                                  | 1                                                                                                     | 2                                                                                                    | 1                                                                                                    | 2                                                                                                    | 2                                                                                                    |
| Total volume (μL)                        | <b>15</b>                                                                                                                                                 | 10                                                                                                    | 10                                                                                                   | 10                                                                                                   | 15                                                                                                   | 15                                                                                                   |
| Thermal cycle program                    | (94°C for 2min) 1 cycle + (94°C for 15s, 61.8°C for 30s, 72°C for 45s) 10 cycles + (94°C for 15s, 61.8°C for 30s, 72°C for <b>50s</b> ) 20 cycles + (72°C | (94°C for 5min) 1 cycle + (94°C for 60s, 58°C for 60s, 72°C for 60s) 35 cycles + (72°C 10min) 1 cycle | (94°C for 4min) 1 cycle + (94°C for 60s, 50°C for 60s, 72°C for 60s) 35 cycles + (72°C 4min) 1 cycle | (94°C for 2min) 1 cycle + (94°C for 30s, 60°C for 30s, 72°C for 45s) 35 cycles + (72°C 3min) 1 cycle | (94°C for 2min) 1 cycle + (94°C for 30s, 56°C for 30s, 72°C for 45s) 35 cycles + (72°C 3min) 1 cycle | (94°C for 2min) 1 cycle + (94°C for 30s, 56°C for 30s, 72°C for 45s) 35 cycles + (72°C 3min) 1 cycle |

---

7min) 1 cycle

---

- Gisder S, Genersch E. 2013 Molecular differentiation of *Nosema apis* and *Nosema ceranae* based on species-specific sequence differences in a protein coding gene. *J. Invertebr. Pathol.* **113**, 1–6. (doi:10.1016/j.jip.2013.01.004)
- Klee J, Tek Tay W, Paxton RJ. 2006 Specific and sensitive detection of *Nosema bombi* (Microsporidia: Nosematidae) in bumble bees (*Bombus* spp.; Hymenoptera: Apidae) by PCR of partial rRNA gene sequences. *J. Invertebr. Pathol.* **91**, 98–104. (doi:10.1016/j.jip.2005.10.012)
- Martín-Hernández R, Meana A, Prieto L, Salvador AM, Garrido-Bailón E, Higes M. 2007 Outcome of colonization of *Apis mellifera* by *Nosema ceranae*. *Appl. Environ. Microbiol.* **73**, 6331–6338. (doi:10.1128/AEM.00270-07)
- Meeus I, Smaghe G, Siede R, Jans K, de Graaf DC. 2010 Multiplex RT-PCR with broad-range primers and an exogenous internal amplification control for the detection of honeybee viruses in bumblebees. *J. Invertebr. Pathol.* **105**, 200-203. (10.1016/j.jip.2010.06.012)

Electronic supplementary material

“Chronic neonicotinoid pesticide exposure and parasite stress differentially affects learning in honeybees and bumblebees”

Saija Piironen & Dave Goulson

Supplementary Table S2, Percentage (%) of bees in different treatment groups screened for parasites by PCR. All *N. ceranae* inoculated honeybees were confirmed positive by PCR (spores detected under the microscope) whereas only 3% of the *Nosema* inoculated bumblebees were positive (no spores were detected under the microscope). One bumblebee was positive for *C. bombi* (belonged to the parasite treatment). None of the screened samples were positive for *A. bombi* and *N. bombi* in bumblebees or for *N. apis* in honeybees.

| Treatment | Honeybee |           | Bumblebee |           |
|-----------|----------|-----------|-----------|-----------|
|           | %        | n/n total | %         | n/n total |
| Control   | 33.6     | 40/119    | 47.9      | 46/96     |
| Pesticide | 35.0     | 42/120    | 47.9      | 46/96     |
| Parasite  | 32.5     | 39/120    | 52.1      | 49/94     |
| Both      | 35.0     | 42/120    | 52.1      | 50/96     |
| Total     | 34.0     | 163/479   | 50.0      | 191/382   |

Electronic supplementary material

“Chronic neonicotinoid pesticide exposure and parasite stress differentially affects learning in honeybees and bumblebees”

Saija Piironen & Dave Goulson

Supplementary Table S3 Percentages (%) and sample sizes of honeybees and bumblebees in different treatment groups responding to sugar stimulus prior proboscis extension response (PER) training, completing the PER training and tested in the memory test.

| Treatment | Honeybee             |           |               |           |              | Bumblebee            |           |               |           |              |
|-----------|----------------------|-----------|---------------|-----------|--------------|----------------------|-----------|---------------|-----------|--------------|
|           | Response to stimulus |           | Completed PER |           | Memory test* | Response to stimulus |           | Completed PER |           | Memory test* |
|           | %                    | n/n total | %             | n/n total | n            | %                    | n/n total | %             | n/n total | n            |
| Control   | 65.7                 | 46/70     | 80.4          | 37/46     | 35           | 78.1                 | 50/64     | 84.0          | 42/50     | 29           |
| Pesticide | 75.0                 | 48/64     | 75.0          | 36/48     | 29           | 76.2                 | 48/63     | 83.3          | 40/48     | 24           |
| Parasite  | 67.2                 | 43/64     | 79.1          | 34/43     | 29           | 70.6                 | 48/68     | 77.1          | 37/48     | 29           |
| Both      | 84.1                 | 53/63     | 90.6          | 48/53     | 43           | 71.9                 | 41/57     | 78.0          | 32/41     | 17           |
| Total     | 72.8                 | 190/261   | 81.6          | 155/190   | 136          | 74.2                 | 187/252   | 80.7          | 151/187   | 99           |

\*The number of bees in the memory test differs from those in PER training as some bees showed a negative response to sugar stimulus after the memory test and were excluded from analysis or died before conducting the memory test.

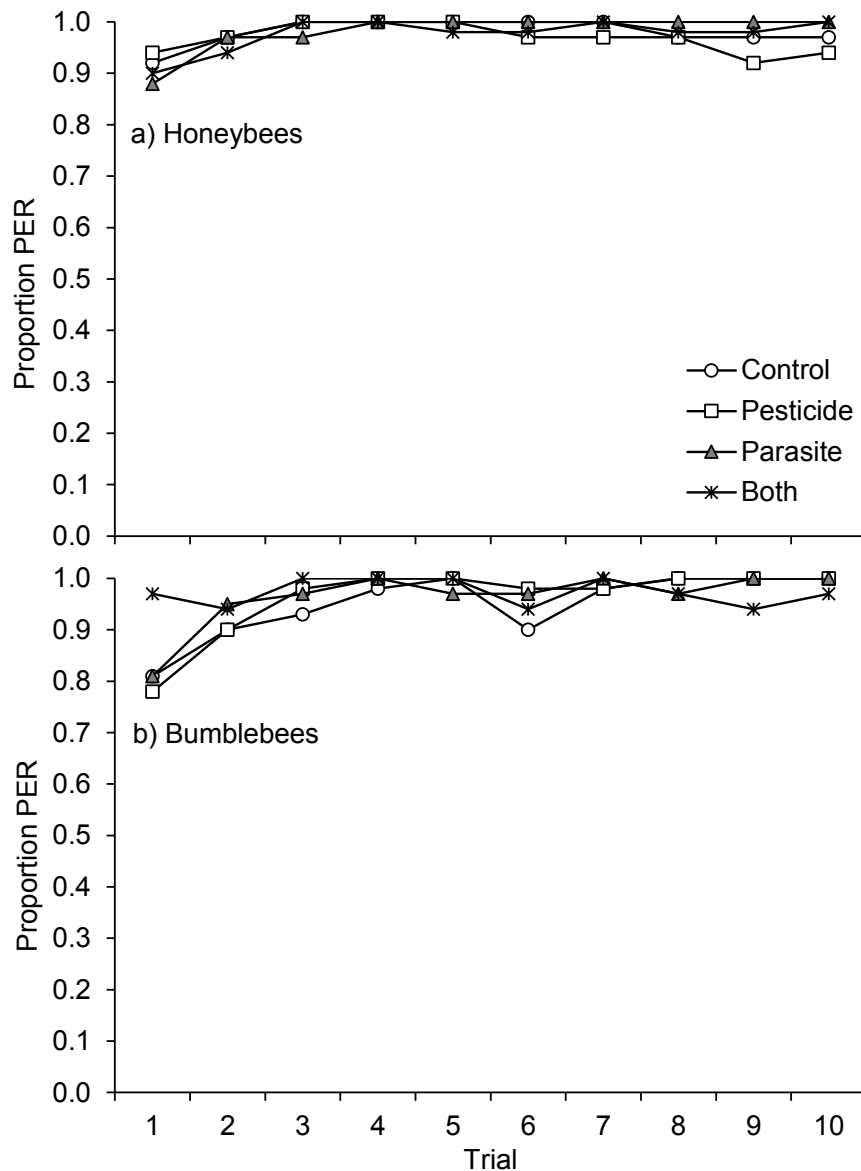

Supplementary Fig. S1 Proportion of proboscis extension responses (PERs) to sugar stimulus (US), for a) honeybee and b) bumblebee workers exposed to pesticide clothianidin and inoculated with the parasite *N. ceranae* across 10 CS-US trials.
